# Supplementary material
Source: PubMed Central journal article supplement (PMC8165001)

**A.**

|               | Primer Sequence                                        |
|---------------|--------------------------------------------------------|
| <i>Yap</i>    | F: GGAAGGAGATGCAATGAACATAGA<br>R: CGTCCAAGATTCGGAECTCA |
| <i>Ankrd1</i> | F: GTCAAGAAGTGTGCTGGGAAGA<br>R: GTTCCAAGTCTGCCAGTGCAA  |
| <i>Cyr61</i>  | F: TGTTTTCAAGAATGTCATGATGA<br>R: GGATGCGGGCAGTTGTAGTT  |
| <i>Gapdh</i>  | F: CGTGTTCCTACCCCCAATGT<br>R: TGTCATCATACTGGCAGTTTCT   |

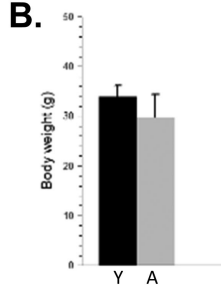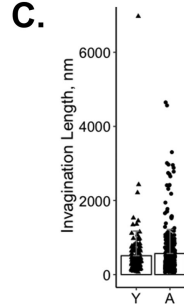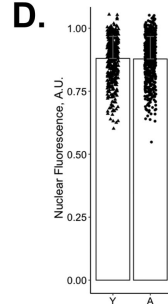

**D.**

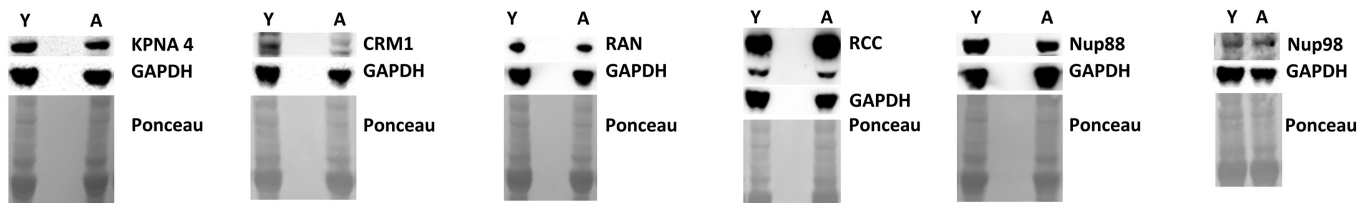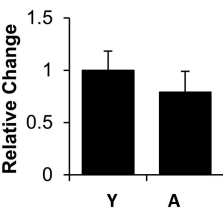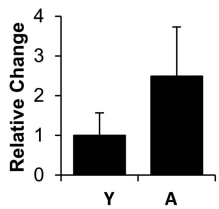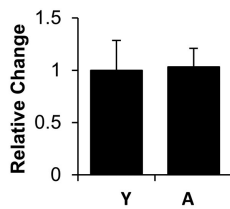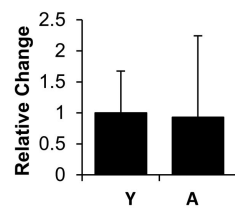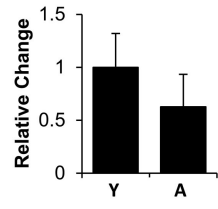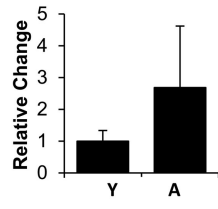

Supplement: NIHMS1695216-supplement-1.pdf [file NIHMS1695216-supplement-1.pdf]
